# Supplementary material for: Research On Fuel Compensation Control of High-pressure Common-Rail Diesel Engine Based On Crankshaft Segment Signals
Source: Research Square preprint supplement (doi:10.21203/rs.3.rs-989414/v1), 2021-11-02
Supplement: Supplementary file 1 [file f4439daef82763cd94726a21.xlsx]

## Sheet: lvtemporary_50916
阶次 - 曲线 0	800	900	1000	1100	1200	1300	1400	1500	1700	1900	2100	2500		阶次 - 曲线 0
0.5	3.89764e-06	3.17312e-06	5.40415e-07	4.51479e-07	2.70384e-07	3.87424e-07	2.84092e-07	2.97915e-07	3.18023e-07	2.37025e-07	2.3869e-07	2.30687e-07		0.5
1	1.53551e-06	1.42853e-06	4.67141e-07	3.77536e-07	5.31873e-07	6.42971e-07	5.48839e-07	7.89647e-07	4.48362e-07	4.4411e-07	3.79076e-07	3.59945e-07		1
1.5	2.36114e-07	7.38481e-07	1.52149e-07	1.63922e-07	2.71029e-07	3.37752e-07	2.46799e-07	2.02952e-07	2.03707e-07	1.68531e-07	1.09591e-07	2.05142e-07		1.5
2	1.10998e-05	7.6922e-06	5.99073e-06	4.06527e-06	2.68032e-06	1.71513e-06	9.1104e-07	5.38641e-07	3.95575e-07	6.75328e-07	7.73816e-07	9.98849e-07		2
2.5	5.14685e-07	4.30854e-07	1.12676e-07	1.44376e-07	1.85678e-07	2.34592e-07	2.35509e-07	1.31228e-07	2.47509e-07	1.50415e-07	3.17214e-08	7.20902e-08		2.5
3	5.93855e-07	7.3848e-08	1.03152e-07	2.34119e-07	1.87344e-07	2.09828e-07	1.37481e-07	9.24242e-08	1.05592e-07	5.61398e-08	9.67514e-08	5.02733e-08		3
3.5	2.6795e-07	2.80952e-07	1.06831e-07	2.67699e-08	6.10363e-08	4.99636e-08	1.26333e-07	1.62238e-07	6.9565e-08	9.0916e-09	6.06268e-08	6.35896e-08		3.5
4	4.34225e-06	3.39797e-06	2.319e-06	1.96756e-06	1.56368e-06	1.24532e-06	9.54387e-07	6.15018e-07	4.55248e-07	3.21149e-07	1.90212e-07	1.02037e-07		4
4.5	2.83938e-07	2.28151e-07	8.46617e-08	3.21084e-08	1.18459e-07	1.81747e-08	4.31447e-08	7.8618e-08	9.21762e-08	3.85288e-08	1.37819e-08	7.9524e-08		4.5
5	5.40888e-07	4.15008e-07	2.59908e-07	2.3119e-07	2.3571e-07	2.14996e-07	1.77041e-07	1.43778e-07	1.83002e-07	1.4353e-07	1.95762e-07	1.00719e-07		5
5.5	1.37754e-07	1.72435e-07	6.46801e-08	5.76211e-08	4.9509e-08	3.00672e-08	4.94308e-08	6.78859e-08	4.1865e-08	5.83712e-08	6.58924e-08	3.18317e-09		5.5
6	1.00105e-06	5.10197e-07	5.5699e-07	3.02007e-07	2.32696e-07	1.85134e-07	1.64974e-07	8.26345e-08	1.11658e-07	9.64398e-08	7.39629e-08	9.80512e-08		6
6.5	1.28908e-07	1.77999e-07	6.76924e-08	4.73123e-08	3.80225e-08	4.36078e-08	3.65077e-08	6.92166e-08	6.11029e-08	2.88982e-08	1.09579e-08	1.00715e-07		6.5
7	5.70233e-07	4.55141e-07	3.26548e-07	2.93264e-07	2.48574e-07	2.53882e-07	1.93519e-07	2.55202e-07	2.37321e-07	1.89554e-07	2.07223e-07	1.51849e-07		7
7.5	2.22514e-07	1.33931e-07	5.44559e-08	1.88626e-08	1.95229e-08	3.66092e-08	7.92936e-08	1.15979e-07	4.14986e-08	3.28671e-08	6.47994e-09	8.20751e-08		7.5
8	1.15455e-07	1.4706e-07	1.43385e-07	6.33093e-08	8.95635e-08	6.85761e-08	7.82489e-08	1.1121e-07	4.61381e-08	3.1245e-08	6.18732e-08	1.92144e-08		8
8.5	8.45138e-08	8.15081e-08	7.73447e-08	1.86983e-08	6.3245e-08	3.18247e-08	3.45479e-08	4.41639e-08	3.90302e-08	2.53325e-08	1.76461e-08	6.36541e-09		8.5
9	2.76427e-07	2.3739e-07	1.57588e-07	1.16533e-07	1.06481e-07	1.13639e-07	1.37634e-07	1.06987e-07	9.61704e-08	1.03371e-07	5.17602e-08	1.08095e-07		9
9.5	9.25542e-08	1.26139e-07	3.28761e-08	4.25277e-08	3.05149e-08	4.70745e-08	4.33798e-08	4.57075e-08	1.59068e-08	2.00475e-08	2.54765e-08	2.30115e-08		9.5
10	9.8195e-08	4.29626e-08	7.91132e-08	9.69941e-08	5.48947e-08	8.21485e-08	5.00712e-08	6.12952e-08	4.45429e-08	2.74971e-08	3.57592e-08	2.82902e-08		10
10.5	9.01874e-08	1.13191e-07	1.81204e-08	2.04874e-08	2.06019e-08	3.98833e-09	2.27236e-08	4.05747e-08	1.77106e-08	2.61409e-08	1.48603e-08	1.23921e-08		10.5
11	1.50504e-08	2.95178e-08	5.87585e-08	5.27968e-08	5.26604e-08	4.07516e-08	7.09999e-08	3.3674e-08	4.608e-08	3.04384e-08	4.13591e-08	3.65612e-08		11
11.5	8.02426e-08	1.1264e-07	3.01883e-08	9.85612e-09	2.06203e-08	1.74797e-08	1.37625e-08	1.46915e-08	1.78169e-08	2.61013e-08	1.53885e-08	1.17758e-08		11.5
12	6.37942e-08	1.01043e-07	2.56385e-08	1.46199e-08	2.77458e-08	2.04207e-08	2.6988e-08	3.03218e-08	1.21993e-08	1.06663e-08	1.52696e-08	2.21156e-08		12
12.5	7.2952e-08	1.0168e-07	7.26871e-09	1.21903e-08	2.3356e-08	6.05135e-09	8.56776e-09	2.35791e-08	1.14018e-08	1.52414e-08	5.93522e-09	5.99467e-09		12.5
13	7.38028e-08	9.14804e-08	1.92474e-08	1.34181e-08	1.24096e-08	1.47956e-08	1.40994e-08	1.84288e-08	1.22354e-08	1.11707e-08	1.36627e-08	6.1177e-09		13
13.5	6.98777e-08	9.35652e-08	9.42253e-09	4.29093e-09	2.23758e-09	4.19137e-09	1.81114e-09	2.92006e-08	3.56708e-09	2.1667e-09	7.59056e-09	5.29528e-09		13.5
14	7.19923e-08	9.27074e-08	4.09799e-09	3.77969e-09	3.20939e-09	5.79372e-09	8.7224e-09	2.39669e-08	7.56844e-09	5.2797e-09	7.95302e-09	4.96849e-09		14
14.5	6.5908e-08	8.84103e-08	4.19365e-11	4.10615e-09	4.82289e-09	1.70265e-09	3.14972e-09	2.6461e-08	3.99883e-09	1.58148e-09	6.18486e-09	2.21449e-09		14.5
15	6.35584e-08	8.64248e-08	1.03908e-09	3.94874e-09	5.28556e-09	1.84833e-09	2.9566e-09	2.56582e-08	3.6223e-09	2.39708e-09	6.12841e-09	1.94116e-09		15
阶次 - 曲线 0	800	900	1000	1100	1200	1300	1400	1500	1700	1900	2100	2500
0.5	3.89764e-06	3.17312e-06	5.40415e-07	4.51479e-07	2.70384e-07	3.87424e-07	2.84092e-07	2.97915e-07	3.18023e-07	2.37025e-07	2.3869e-07	2.30687e-07
1	1.53551e-06	1.42853e-06	4.67141e-07	3.77536e-07	5.31873e-07	6.42971e-07	5.48839e-07	7.89647e-07	4.48362e-07	4.4411e-07	3.79076e-07	3.59945e-07
1.5	2.36114e-07	7.38481e-07	1.52149e-07	1.63922e-07	2.71029e-07	3.37752e-07	2.46799e-07	2.02952e-07	2.03707e-07	1.68531e-07	1.09591e-07	2.05142e-07
2	1.10998e-05	7.6922e-06	5.99073e-06	4.06527e-06	2.68032e-06	1.71513e-06	9.1104e-07	5.38641e-07	3.95575e-07	6.75328e-07	7.73816e-07	9.98849e-07
2	1.10998e-05	7.6922e-06	5.99073e-06	4.06527e-06	2.68032e-06	1.71513e-06	9.1104e-07	5.38641e-07	3.95575e-07	6.75328e-07	7.73816e-07	9.98849e-07
阶次 - 曲线 0	800	900	1000	1100	1200	1300	1400	1500	1700	1900	2100	2500
0.5	0.351145	0.412511	0.0902085	0.111058	0.100878	0.225886	0.311833	0.553086	0.803951	0.350978	0.308458	0.230953
1	0.138337	0.185711	0.0779773	0.0928686	0.198436	0.374882	0.602431	1.466	1.13344	0.657621	0.489879	0.36036
1.5	0.0212719	0.0960039	0.0253974	0.0403225	0.101118	0.196925	0.270898	0.376785	0.514964	0.249554	0.141624	0.205378
2	1	1	1	1	1	1	1	1	1	1	1	1
